# Supplementary material
Source: Springer Nature journal article supplement (https://www.springermedizin.de/resource/supplementary/12955_2008_543_MOESM2_ESM.pdf/9560668)

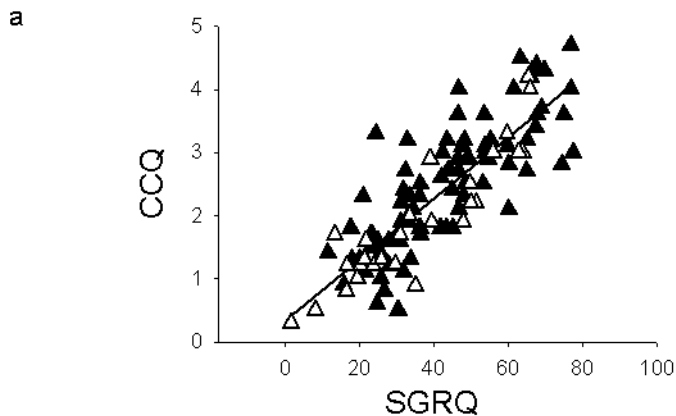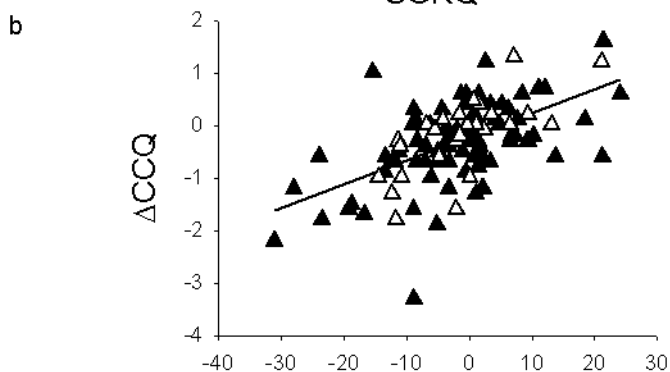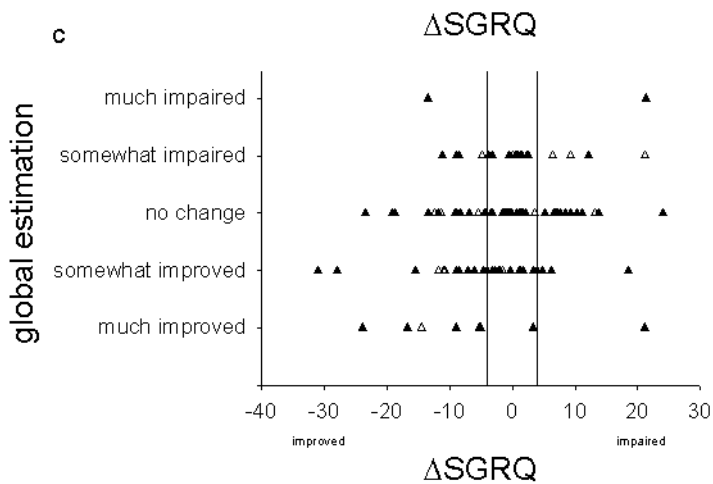

Supplement: MOESM2 [file 9560668]
